# Supplementary material
Source: publisher figshare collection journal article supplement (https://karger.figshare.com/articles/dataset/_/14269724)
Supplement: Supplementary file 3 [file 1]

## A. Follow-up

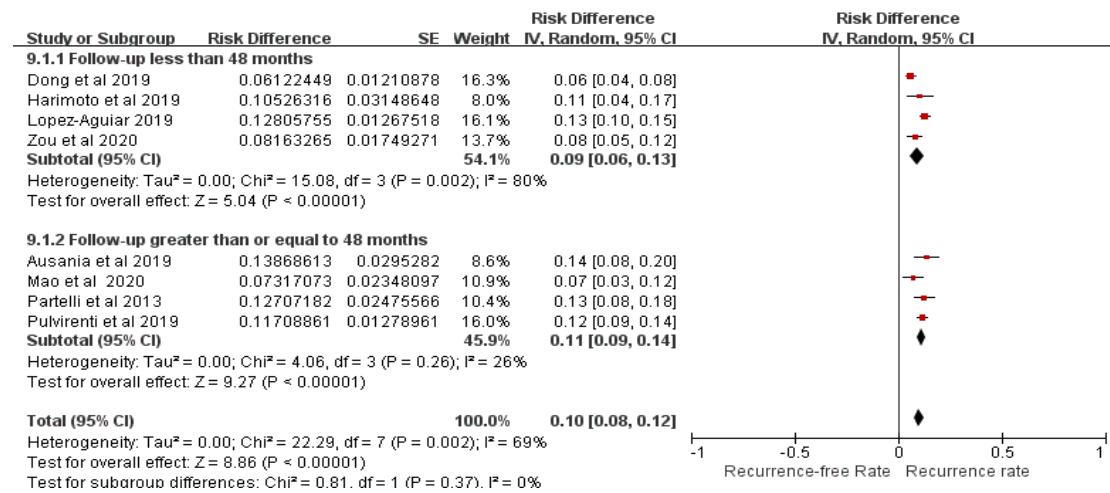

## B. Region

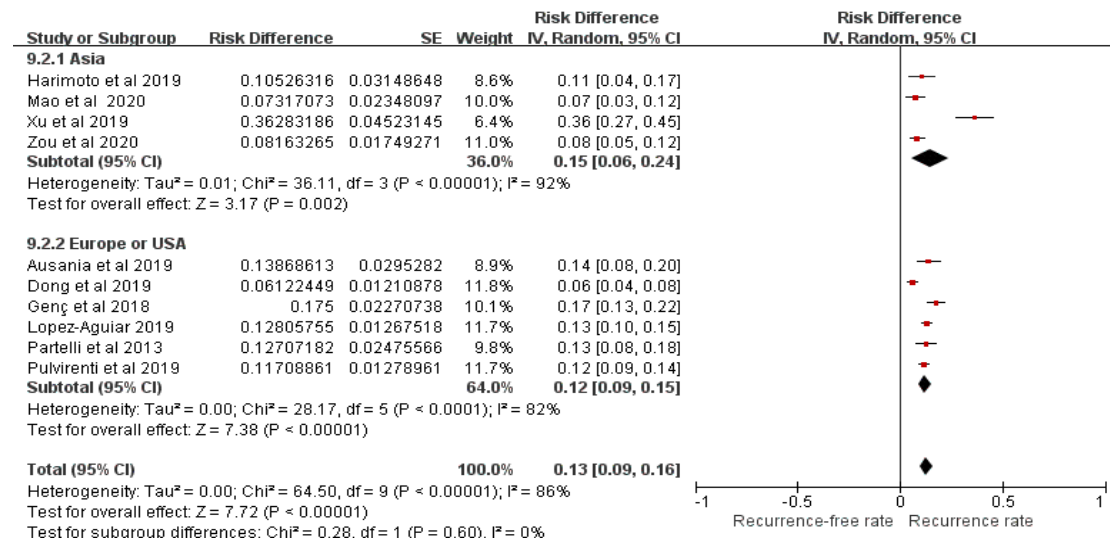

## C. Sample size

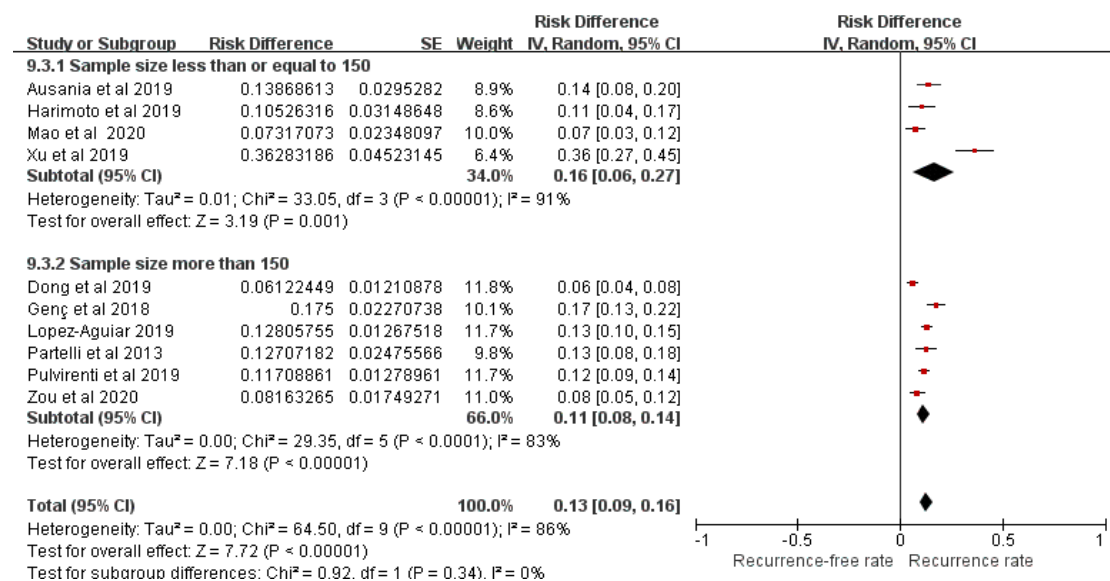

## D Tumor size

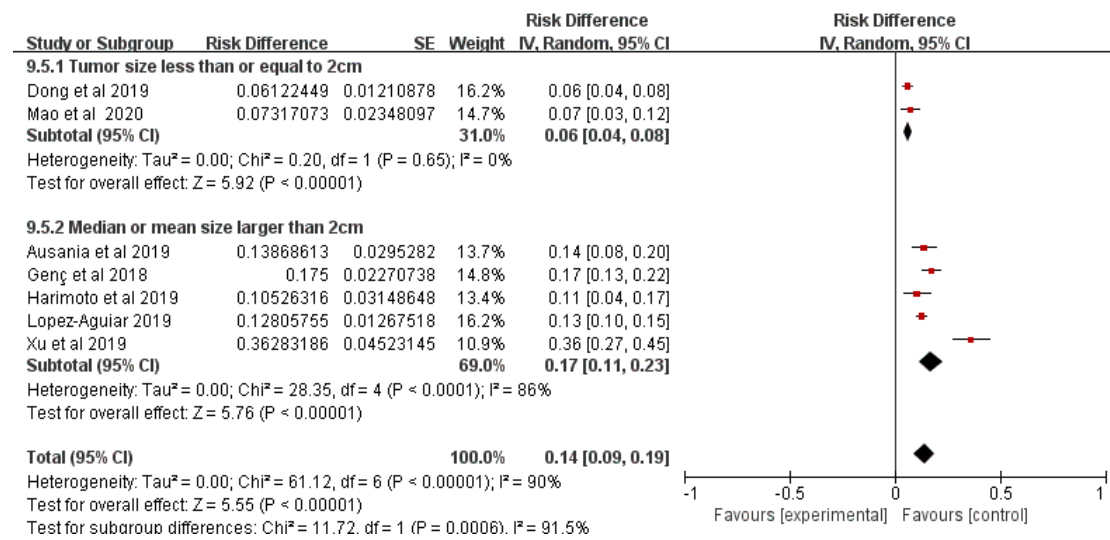

**Supplementary Figure 1 Forest plot of subgroup analysis for recurrence rate**
