# Supplementary material
Source: publisher figshare collection journal article supplement (https://karger.figshare.com/articles/dataset/_/14269724)
Supplement: Supplementary file 4 [file 1]

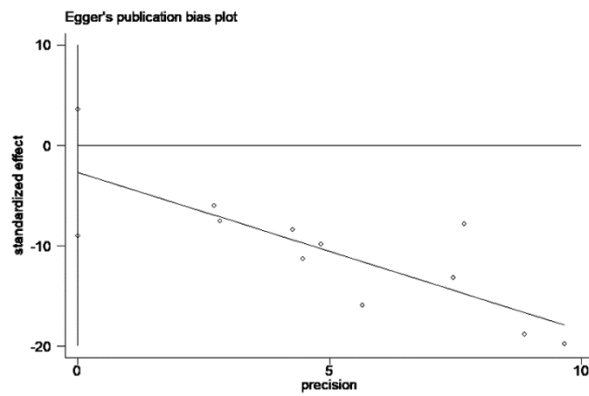

**Recurrence rate, p value=0.354**

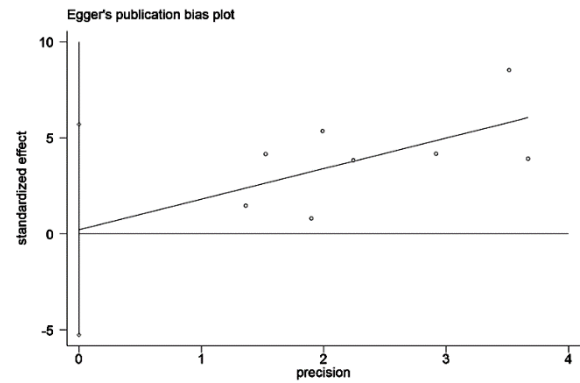

**Grade, p value=0.925**

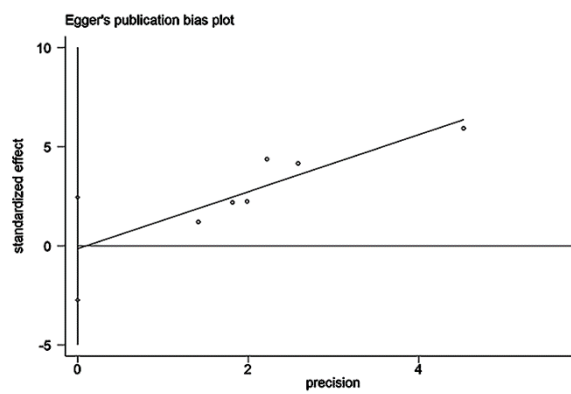

**Lymph node status, p value=0.876**

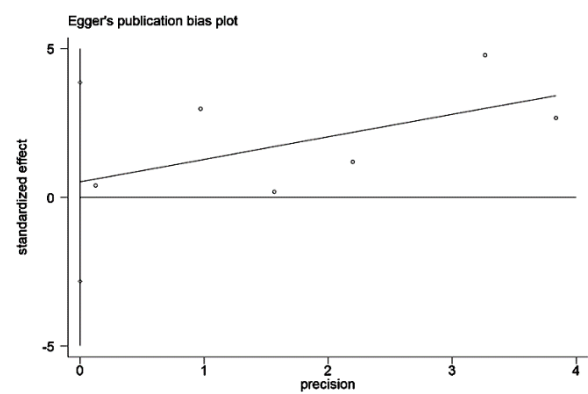

**Resection margin, p value=0.43**

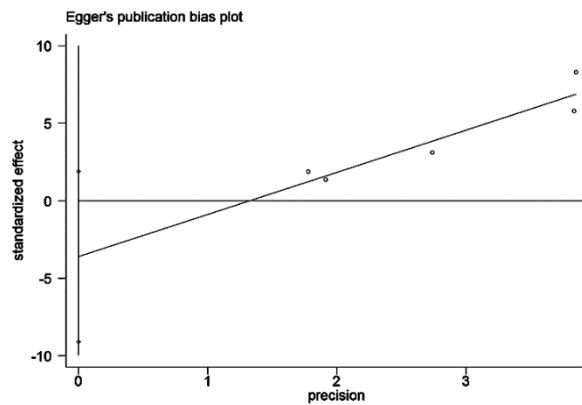

**Vascular invasion, p value=0.128**

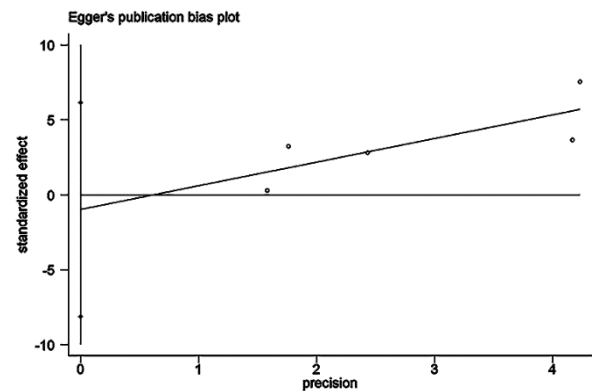

**Perineural invasion, p value=0.691**

**Supplementary Figure 4 Egger's publication bias plot**
