# Supplementary material
Source: publisher figshare collection journal article supplement (https://karger.figshare.com/articles/dataset/_/14269724)

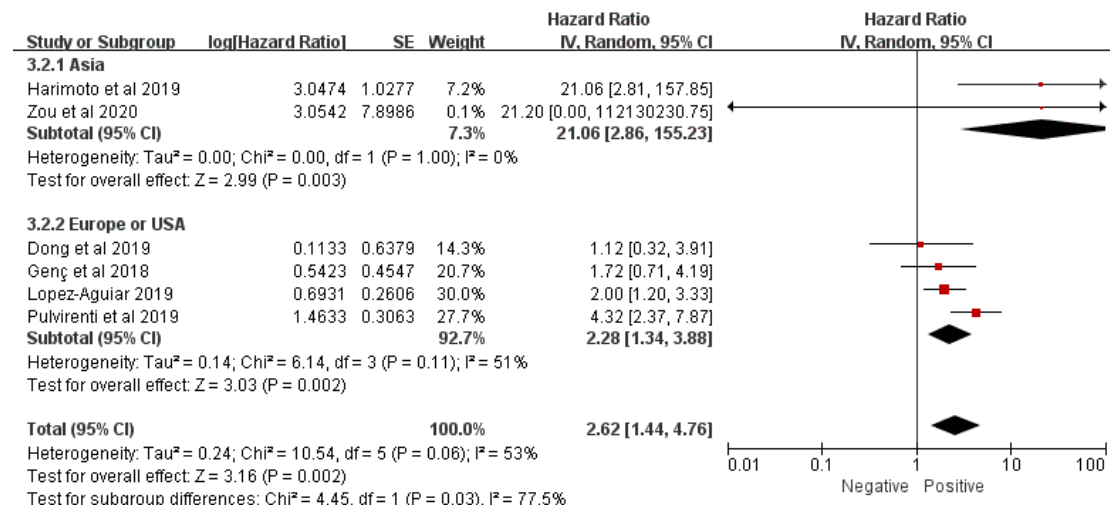

**Supplementary Figure 3 Forest plot of subgroup analysis for resection margin on region**

Supplement: Supplementary file 2 [file 1]
